# Supplementary material for: A novel, density-independent and FTIR-compatible approach for the rapid extraction of microplastics from aquatic sediments
Source: Royal Society of Chemistry journal article supplement (doi:10.1039/c6ay02733d), 2017-01-01

Supplementary Figure 1. We evaluated spectra ten days after oil extraction to ensure that oil was sufficiently removed following our protocol. Presented here are spectra after oil extraction for: (A) polyvinyl chloride; (B) acrylonitrile butadiene styrene; (C) vinyl; (D) nylon; (E) polyester; (F) stain-resistant polyester. Characteristic peaks from 1700-1800 for canola oil were not observed. Presented spectra were identical to original spectra that were taken prior to oil extraction (data not shown).

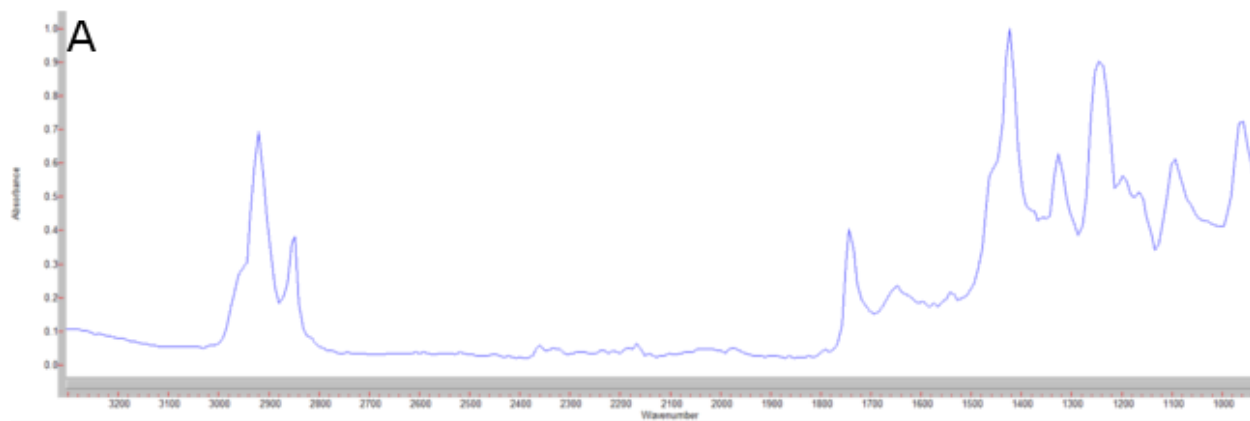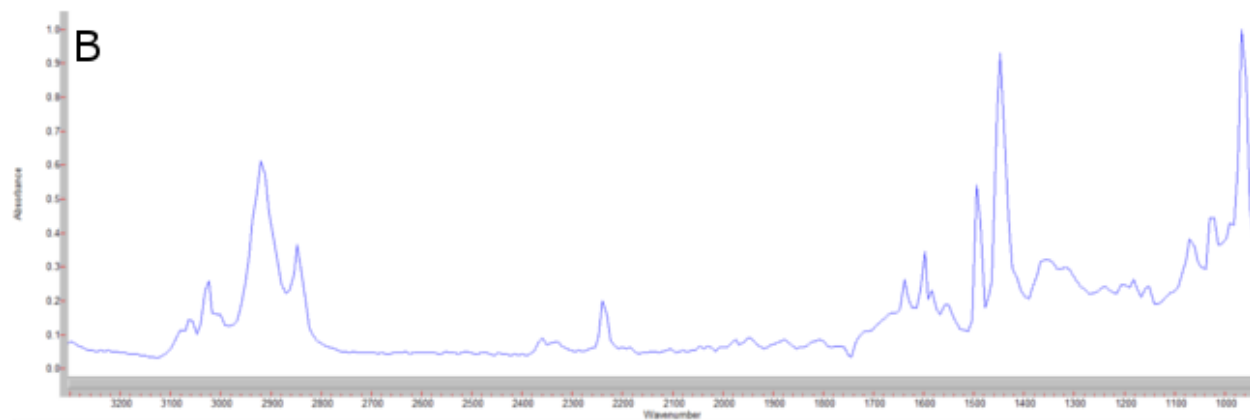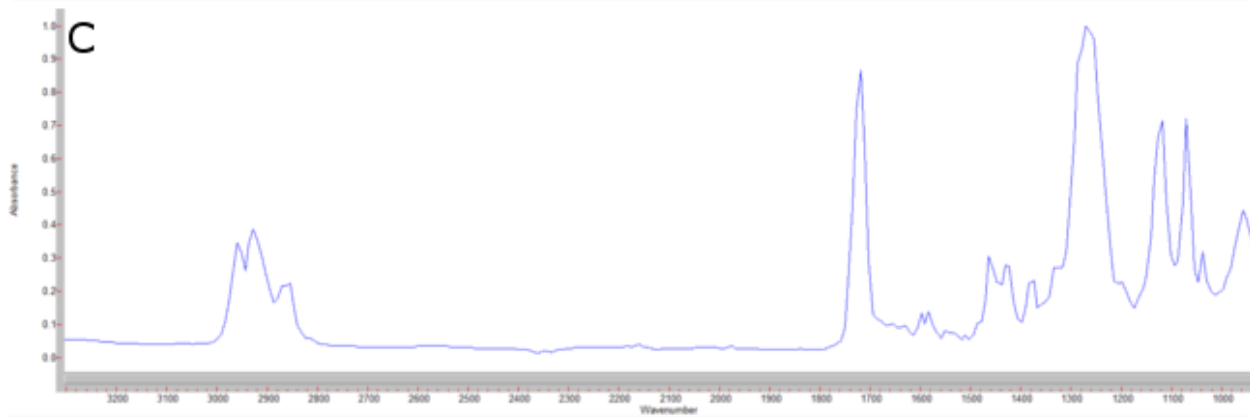

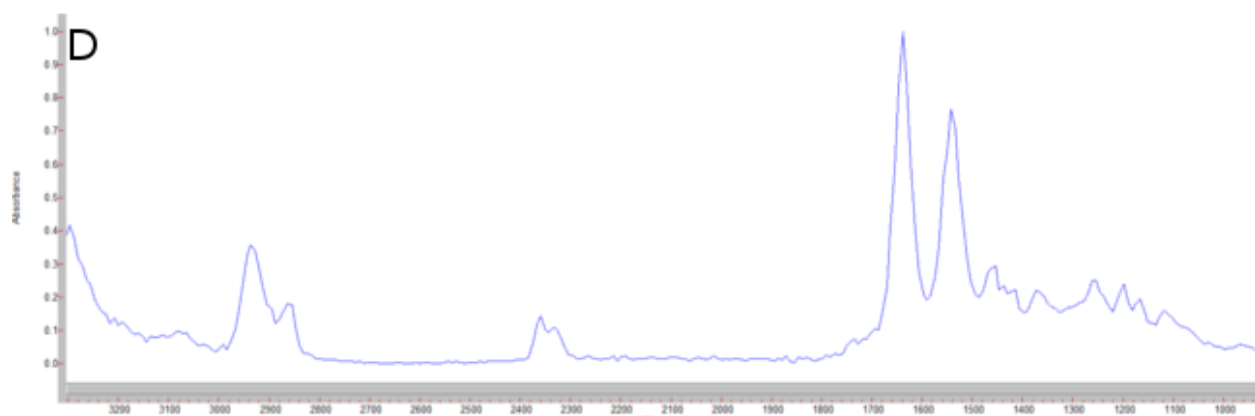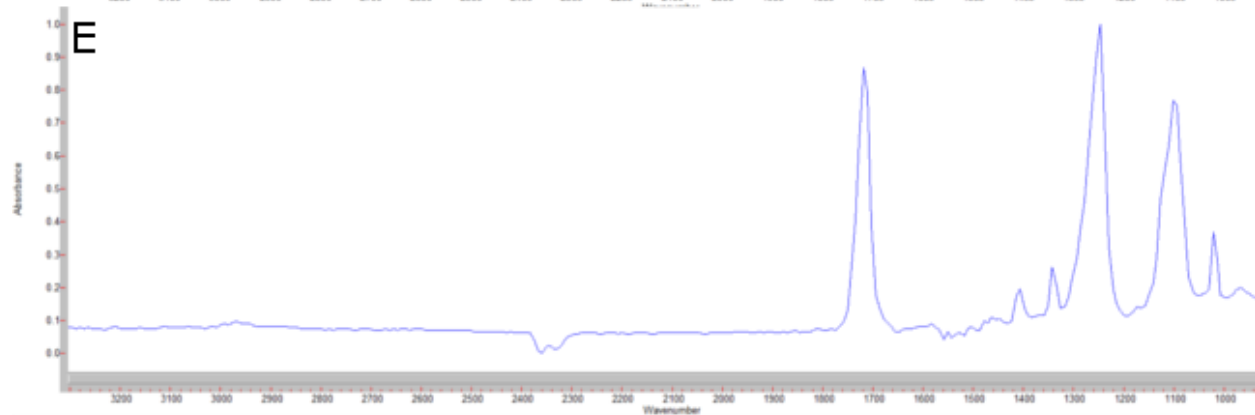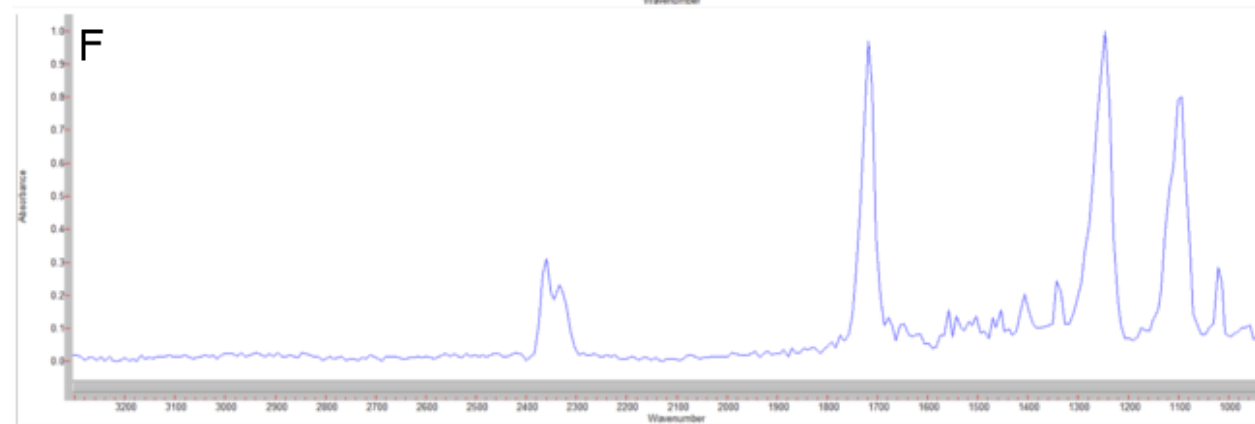

Supplement: c6ay02733d1.pdf [file c6ay02733d1.pdf]
